# Supplementary material for: Comparative Study of Thermal and Plasma-Enhanced Atomic Layer Deposition of Iron Oxide Using Bis(N,N′-di-butylacetamidinato)iron(II)
Source: MDPI journal article supplement (doi:10.3390/nano13121858), 2023-06-14
Supplement: s1 [file s1]

**Supplementary Materials:**

**Comparative Study of Thermal and Plasma-Enhanced  
Atomic Layer Deposition of Iron Oxide Using  
Bis(*N,N'*-di-butylacetamidinato)iron(II)**

**Boyun Choi <sup>†</sup>, Gun-Woo Park <sup>†</sup>, Jong-Ryul Jeong and Nari Jeon <sup>\*</sup>**

Department of Materials Science and Engineering, Chungnam National University,  
Daejeon 34134, Republic of Korea; bow06123@o.cnu.ac.kr (B.C.);  
adgv9073@gmail.com (G.-W.P.); jrjeong@cnu.ac.kr (J.-R.J.)

<sup>\*</sup> Correspondence: njeon@cnu.ac.kr

<sup>†</sup> These authors contributed equally to this work.

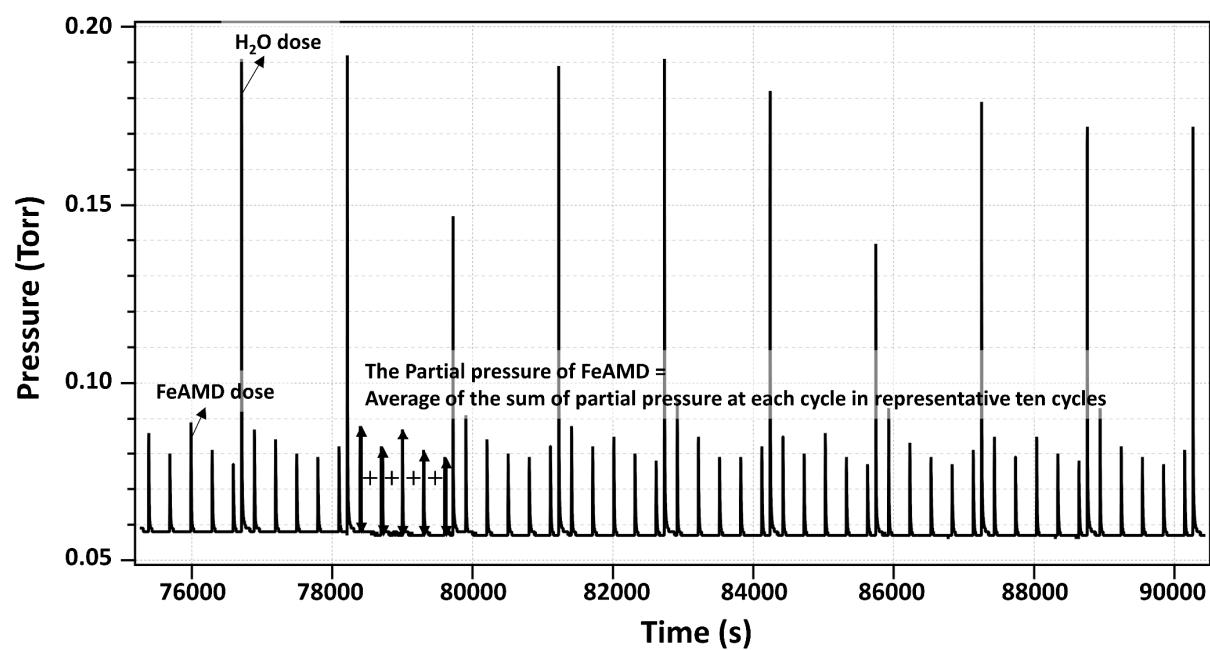

**Figure S1.** An example of the pressure log collected during the FeAMD half-cycle, in which the FeAMD dose was repeated five times. In this log, the partial pressure of FeAMD was recorded as 128 mTorr.

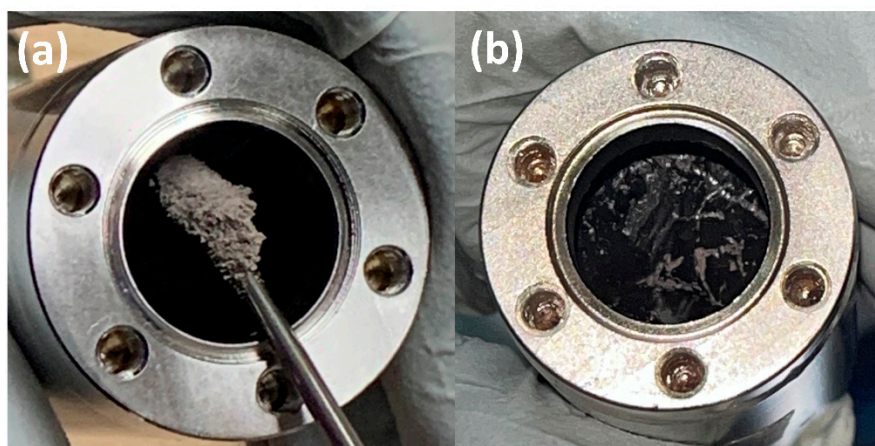

**Figure S2.** Pictures of FeAMD precursor of **(a)** an as-received state, and **(b)** an agglomerated state.

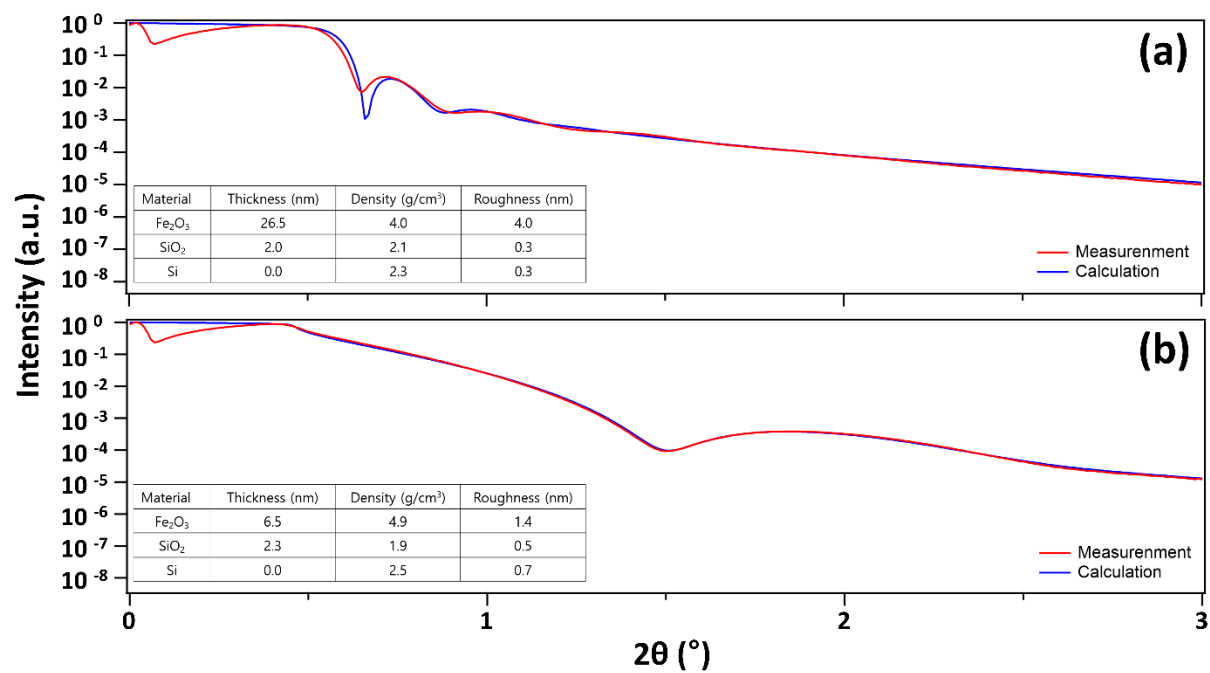

**Figure S3.** X-ray reflectivity spectra of **(a)** thermal ALD and **(b)** PEALD films.

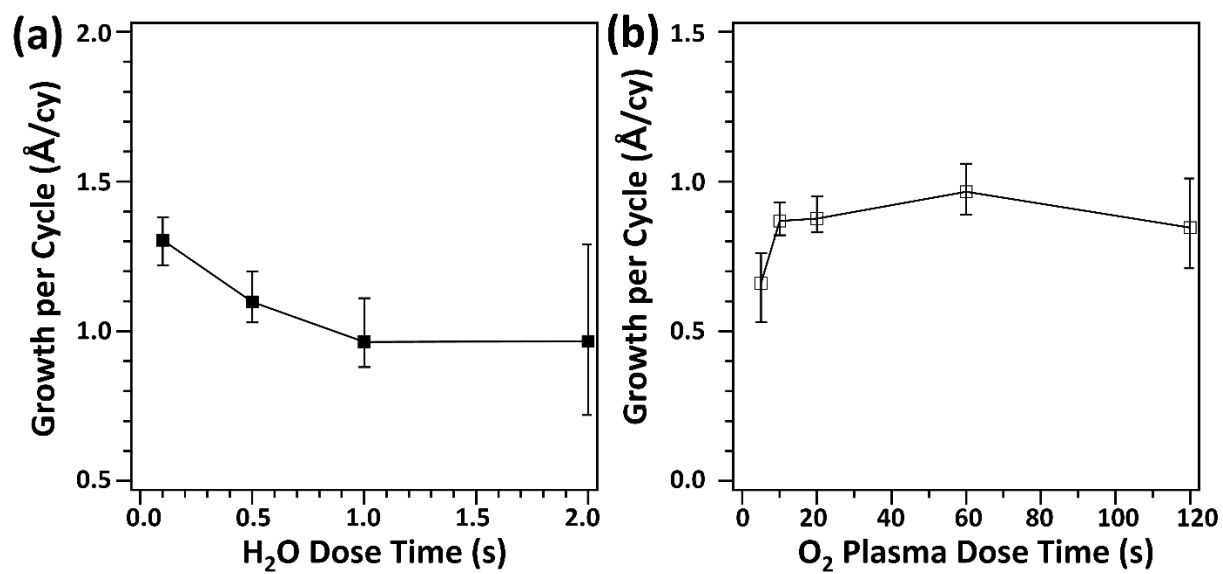

**Figure S4.** GPC of  $\text{FeO}_x$  films as a function of (a)  $\text{H}_2\text{O}$  dose time (thermal ALD) and (b)  $\text{O}_2$  plasma time (PEALD).

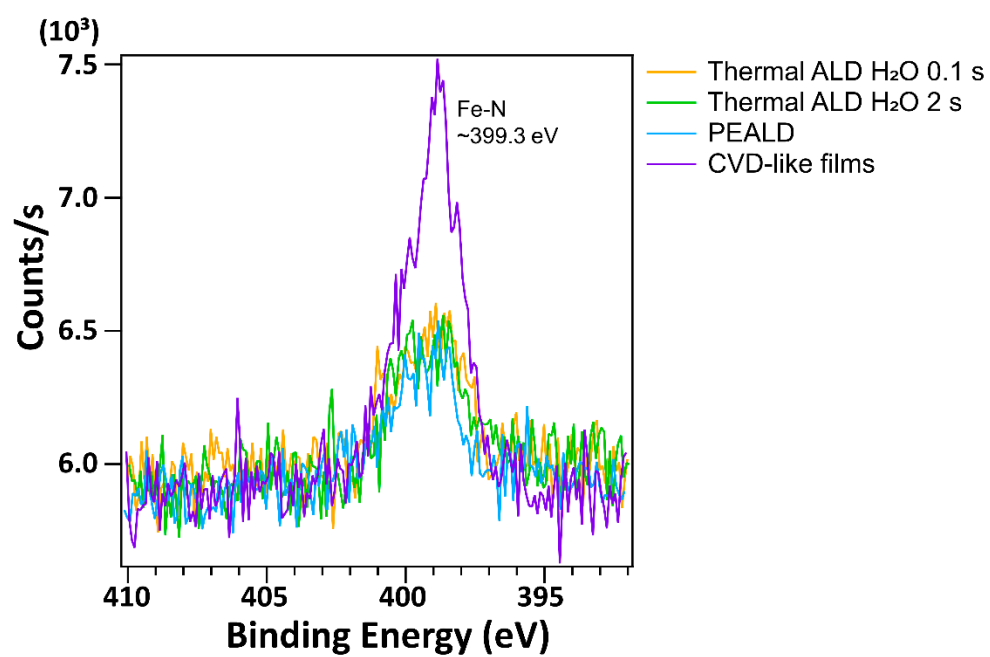

**Figure S5.** N 1s HRXPS of the thermal ALD, PEALD, and CVD-like films.
